# Supplementary material for: Neutrophil extracellular traps contribute to coagulopathy after traumatic brain injury
Source: PubMed Central journal article supplement (PMC10070118; doi:10.1172/jci.insight.141110), 2023-03-22
Supplement: jciinsight-8-141110-s235.pdf [file jciinsight-8-141110-s235.pdf]

## 1 **Supplementary Materials**

### 2 **NETs isolation**

3 For NETs isolation (Figure 3I-L, Figure 4D, E, G-I, Figure 5, Supplementary Figure 3 and 6),  
4 isolated neutrophils ( $5 \times 10^6$  neutrophils/ml) from healthy subjects were incubated with 500 nM  
5 PMA for 4 h. To lift off all adherent NETs from the bottom, we removal of the supernatant  
6 and wash the bottom of each dish by pipetting 15 ml of cold PBS on the bottom of the dish  
7 and collected solution, centrifuge for 10 min at  $450 \times g$  at  $4^\circ\text{C}$ . Then, we divided supernatant  
8 into 1.5 ml micro-centrifuge tubes and centrifuge for 10 min at  $18,000 \times g$  at  $4^\circ\text{C}$ .

9 For NETs isolation (Figure 4B, 4C, supplemental Figure 8),  $1.5 \times 10^6$  purified neutrophils  
10 from healthy subjects (Control NETs) and TBI patients (coagulopathic patients NETs and  
11 non-coagulopathic patients NETs) were seeded in six-well culture plates in RPMI culture  
12 medium for 4h ( $37^\circ\text{C}$  and  $5\% \text{CO}_2$ )(1, 2). Following incubation, the culture medium was  
13 removed, and each well was washed twice with pre-warmed RPMI. To isolate in vitro  
14 generated NET structures, 750ul of fresh RPMI were added in each well and NETs adherent  
15 to the plate were collected after vigorous agitation. The medium was centrifuged at  $20 \times g$  for  
16 5 min and supernatant phase, containing NETs, was collected and stored at  $-20^\circ\text{C}$  until use.  
17 Measure DNA concentration in isolated NETs ( $\mu\text{gDNA/ml}$ ) using spectrophotometry and we  
18 stored isolated NETs at  $-80^\circ\text{C}$  for further experiment.

19

### 20 **NETs stimulation**

21 Human neutrophils were isolated from healthy subjects or patients by using human neutrophil  
22 separation medium (TBD, Tianjin) according to the manufacturer's protocol. Purity of  
23 neutrophils was  $>95\%$  (Wright–Giemsa staining). To compare the ability of NETs generation,  
24 neutrophils from each group were cultured in  $5\% \text{CO}_2$  at  $37^\circ\text{C}$  in RPMI (Gibco) for 4 h  
25 (Figure 2B-E). To investigate the role of platelets on NETosis, control neutrophils were  
26 incubated with PRP (20%) or platelets(platelets:neutrophils=20:1) from citrate blood of  
27 healthy subjects and TBI patients for 2 hours . To determine if HMGB1 induced NET  
28 formation through autophagy, recombinant HMGB1 (HMG Biotech,  $10 \mu\text{g/mL}$ ), Box A

29 (HMG Biotech, 10 µg/mL), HCQ (MedChemExpress, HY-B1370, 50µM,) were incubated  
30 with neutrophils (1 x 10<sup>5</sup> cells per well) for 1 hour. To detect the interaction between NETs  
31 and coagulation factors, isolated NETs we incubated with DNase I (100 U/mL, Merck),  
32 lactadherin (200 nM, Novus), anti-TF antibody (40 µg/ml) and anti-IgG antibody for 1 h and  
33 cultured with platelet-poor plasma for 10 min at 37°C.

34

### 35 **NETs quantification**

36 For NETs quantification, we detected NET–DNA complex (MPO-DNA, NE-DNA,  
37 citH3-DNA, PS-DNA, TF-DNA, fibrinogen-DNA, prothrombin-DNA, factor X-DNA) using  
38 a modified capture ELISA method. We first used myeloperoxidase (MPO) ELISA kit  
39 (Jingkangbio, Shanghai), neutrophil elastase (NE) ELISA kit (Jingkangbio, Shanghai) and  
40 citH3 ELISA kit (Jingkangbio, Shanghai), human PS ELISA kit (Jianglaibio, Shanghai),  
41 human TF ELISA kit (Cloud Clone), fibrinogen ELISA kit (Jingkangbio, Shanghai),  
42 prothrombin ELISA kit (Jingkangbio, Shanghai), factor X ELISA kit (Jingkangbio, Shanghai)  
43 to capture MPO, NE, citH3, PS, TF, fibrinogen, prothrombin, factor X in plasma respectively,  
44 according to the manufacturer's protocol. Then, Quant-iT PicoGreen dsDNA assay kit  
45 (Invitrogen) was added to per well according to manufacturer's directions to detect DNA  
46 concentrations, defined as NET-DNA concentrations. Cell-free DNA (Cf-DNA) was also  
47 detected by Quant-iT PicoGreen dsDNA assay kit (Invitrogen) according to manufacturer's  
48 directions.

49

### 50 **Coagulation assays**

51 To detect the generation of intrinsic FXa, platelets (1 x 10<sup>5</sup>) were incubated with DNase I  
52 (100 U/mL, Biolabs), activated protein C (APC, 100 nM, Med Chem Express), and sivelesat  
53 (100 nM, Med Chem Express). Then treated platelets were incubated with a mixture of  
54 coagulation factor (1 nM factor IXa, 130nM factor X, 0.2 nM thrombin and 5 nM factor VIII)  
55 and CaCl<sub>2</sub> (5 mM) in factor Xa buffer (1 ml 10xTBS, 200 µl 10% BSA and 8.8 ml ddH<sub>2</sub>O)  
56 for a final reaction volume of 40 µl. After 5 min at 25 °C, the reaction was stopped by the

57 addition of EDTA (7 mM, final concentration). FXa generation was estimated immediately  
58 with the chromogenic substrate S-2765 (0.8 mM). Optical densities at 405 nm were recorded  
59 to represent the rate of substrate cleavage of a standard dilution of FXa. The extrinsic  
60 activation of factor X by factor VIIa was also measured in factor Xa buffer. The platelets ( $1 \times$   
61  $10^5$ ) were mixed with 130 nM factor X, 1 nM factor VIIa and 5 mM  $\text{Ca}^{2+}$  instead. The amount  
62 of FXa formed was determined as described above. Prothrombinase formation was measured  
63 as follows: platelets ( $1 \times 10^5$ ) were incubated with 1 nM FVa, 0.05 nM FXa, 1  $\mu\text{M}$   
64 prothrombin and 5 mM  $\text{Ca}^{2+}$  in prothrombinase buffer (1 ml 10 x TBS, 50  $\mu\text{l}$  10% BSA and  
65 8.95 ml ddH<sub>2</sub>O) for 5 min at 25 °C. Thrombin production was assessed after the addition of  
66 EDTA and chromogenic substrate S-2238, as mentioned above. Human alpha-thrombin (IIa)  
67 human factor X, Xa, IXa, VIIa, VIII and thrombin were obtained from Enzyme Research  
68 Laboratories (South Bend, IN). Chromogenic substrates S-2765 and S-2238 were obtained  
69 from Instrumentation Laboratory Company (MA, USA).

70

71

72

73

74

75

76

77

78

79

80

81

82

83

84

85

86 **Supplement Figure 1**

87 (A) Flow cytometry analysis of NETing neutrophils from whole blood. (B) The flow  
88 cytometry strategy of platelet-neutrophil aggregates. (C) The flow cytometry strategy of  
89 platelets in whole blood.

90

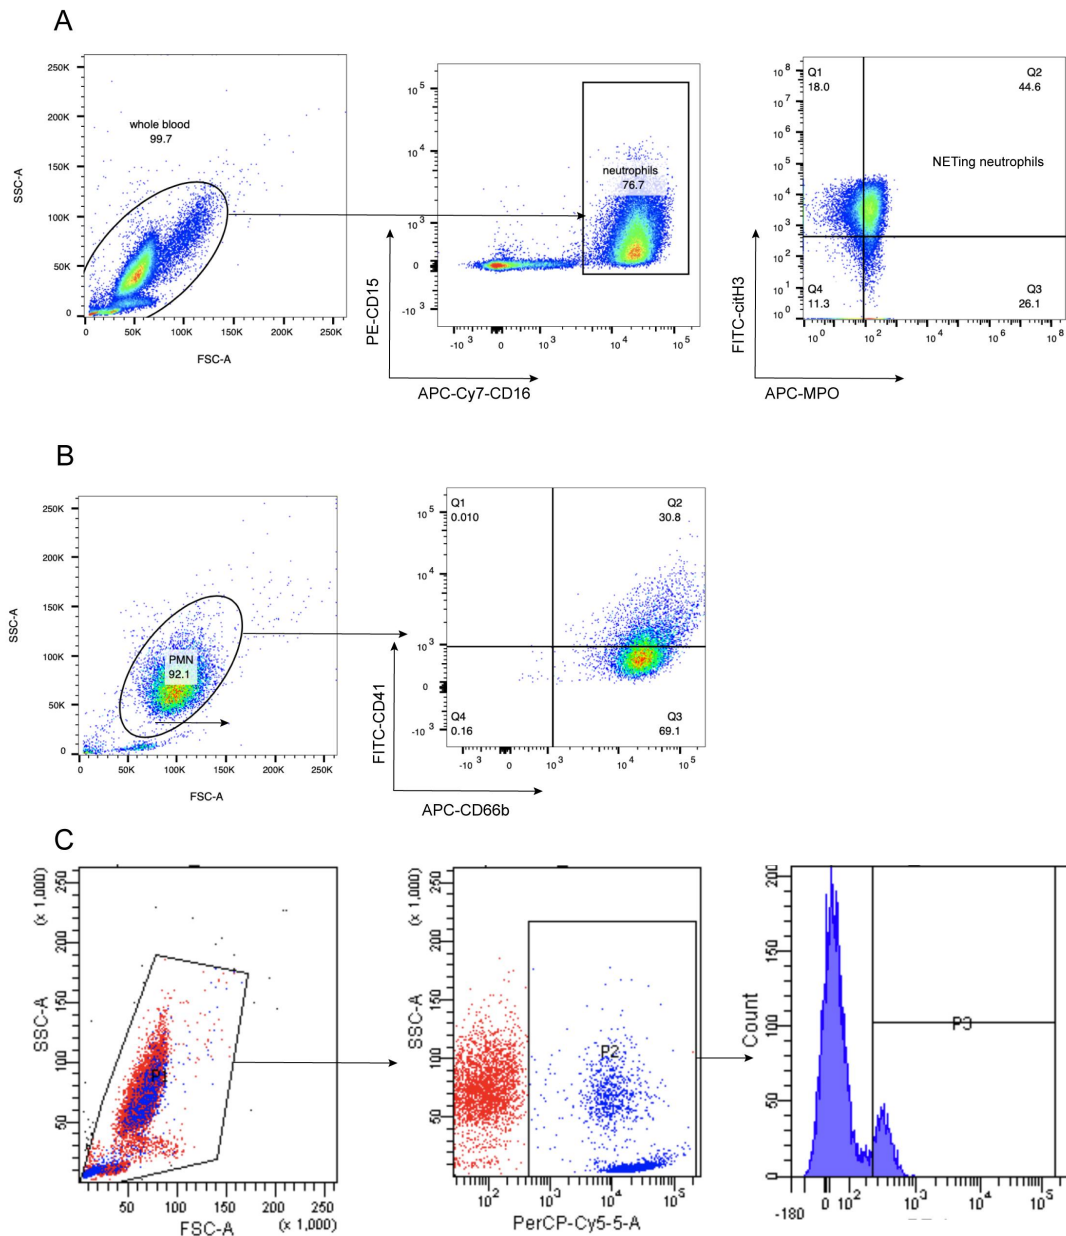

91

92

93

94

95

96 **Supplement Figure 2**

97 Control neutrophils were incubated with recombinant HMGB1 protein at different  
98 concentrations. The concentrations of PS-DNA (A) and TF-DNA (B) in the culture  
99 supernatant from each group. (C-F) Representative confocal images of PS (green) and TF (red)  
100 on neutrophils incubated with HMGB1. The inset scale bar in C-F is 20  $\mu$ m. One  
101 representative out of five (H and J) independent experiments is shown. Statistics, one-way  
102 ANOVA with Tukey's multiple comparisons test. Data are presented as the mean  $\pm$  SD.  
103 \*\*\*\*P<0.0001.

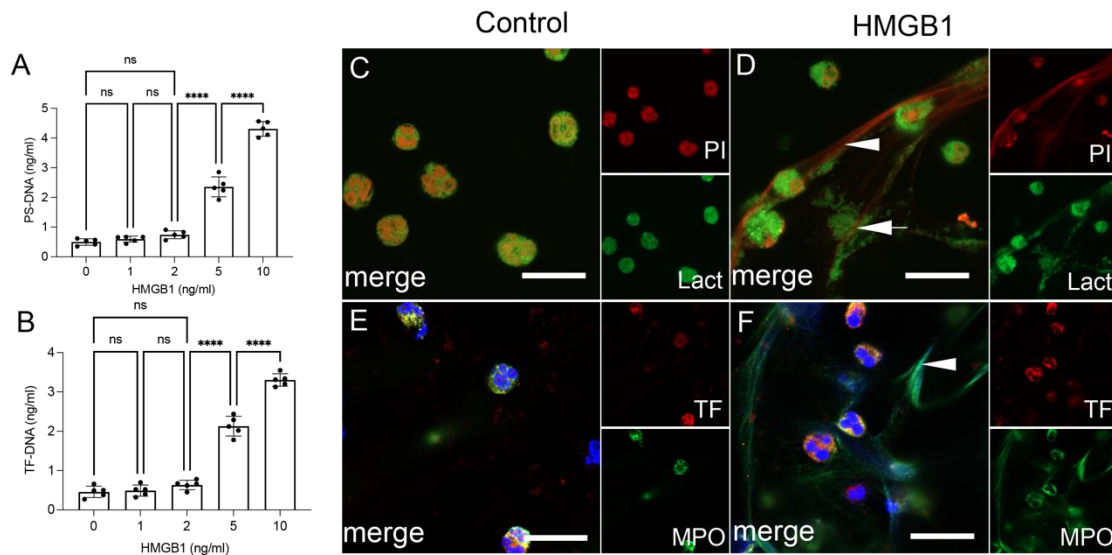

104

105

106

107

108

109

110

111

112

113

114

115

116

117

118 **Supplement Figure 3**

119 The expression of HMGB1 on isolated NETs, control PLTs treated with or without NETs.

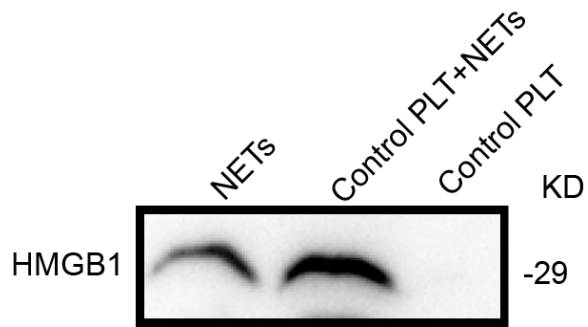

120

121

122

123

124

125

126

127

128

129

130

131

132

133

134

135

136

137

138

139

140

141

142 **Supplement Figure 4**

143 (A-C) The TAT complex was positively correlated with the NET markers citH3-DNA,

144 MPO-DNA, and NE-DNA in plasma samples from TBI patients with coagulopathy. Statistics,

145 Spearman correlation test(A-C).

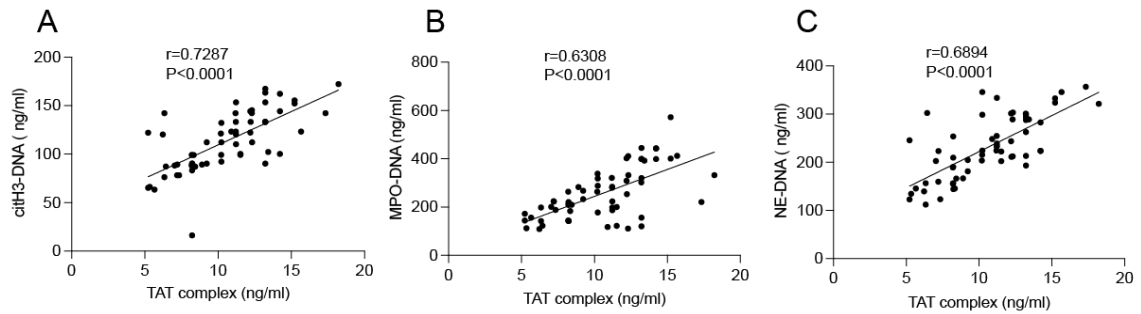

146

147

148

149

150

151

152

153

154

155

156

157

158

159

160

161

162

163

164

165

166 **Supplement Figure 5**

167 NETing neutrophils were incubated with plasma and stained with coagulation factors,  
168 including fibrinogen (red), prothrombin (red), factor X (red) and MPO (green). (A-C)  
169 Representative confocal images of colocalization of NETs and coagulation factors. The inset  
170 scale bar in A-C is 20  $\mu$ m.

NETs+plasma

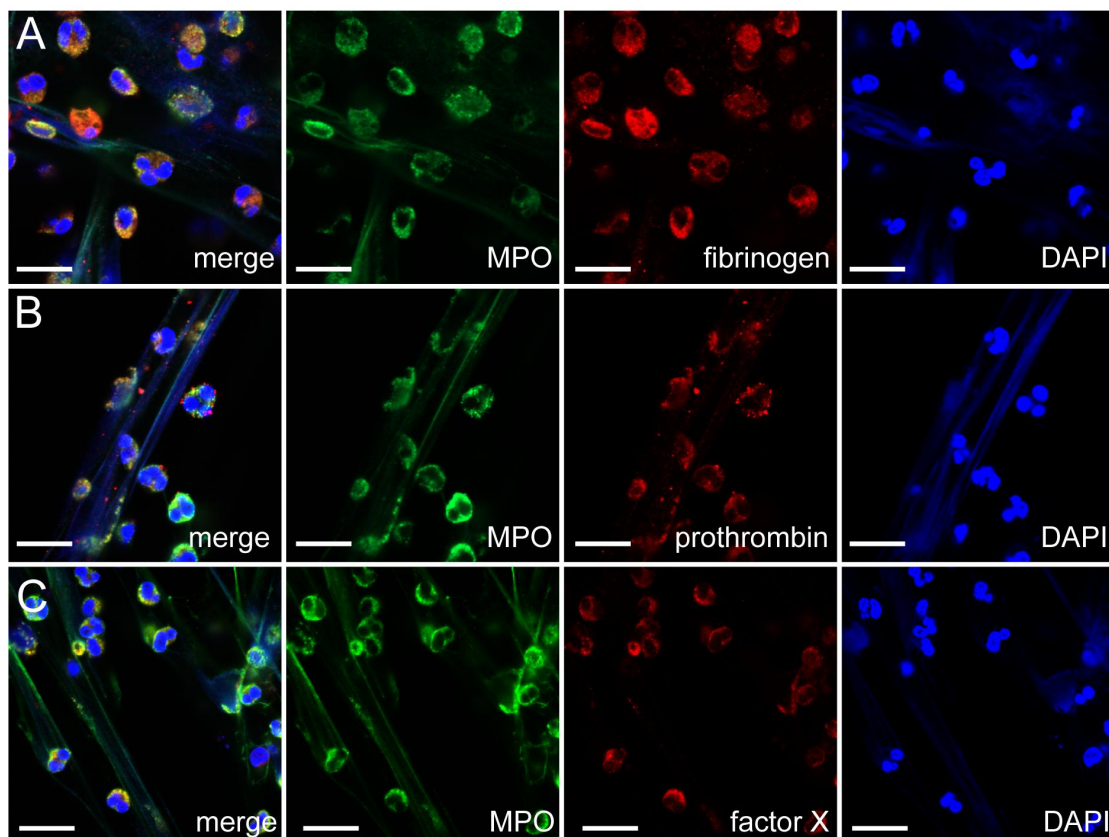

171

172

173

174

175

176

177

178



179

180

181 **Supplement Figure 6**

182 Control platelets were incubated with isolated NETs. intrinsic Xa (A), extrinsic Xa (B) and  
 183 thrombin (C) production in platelets were dependent on NETs concentrations, and these  
 184 effects could be significantly diminished by NETs inhibitors. (D) Representative confocal  
 185 images of fibrin formation in platelets. The inset scale bar in D is 20  $\mu$ m. One representative  
 186 out of eight (A-C) independent experiments is shown. Statistics, Kruskal-Wallis test with  
 187 Dunn's multiple comparisons test(A-C). Data are presented as the mean  $\pm$  SD. \*\*P< 0.01 and  
 188 \*\*\*\*P< 0.0001.

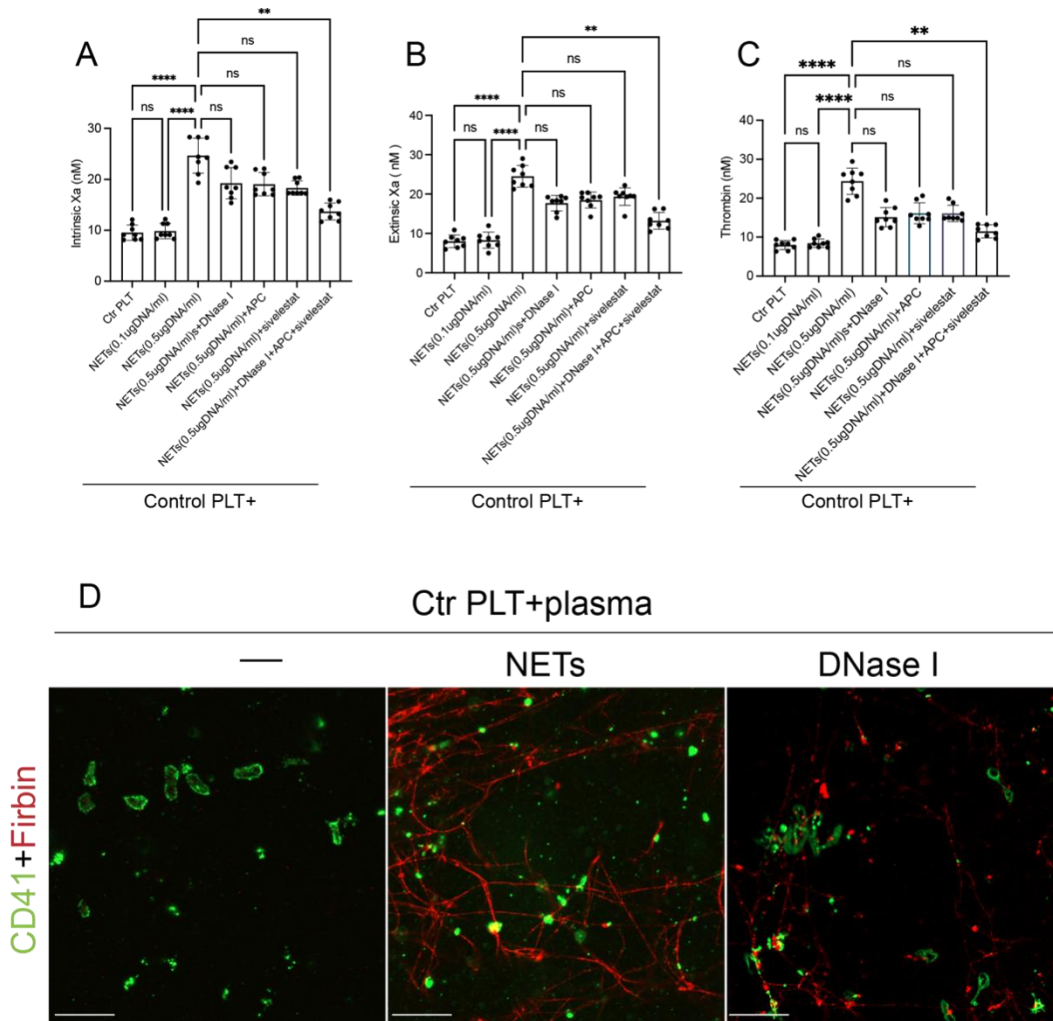

189

190

191

192

193  
194  
195  
196  
197  
198  
199  
200  
201  
202  
203  
204  
205  
206

### Supplement Figure 7

The plasma levels of the endothelial markers syndecan-1 (A), soluble thrombomodulin (B) and VWF(C) were detected in samples from each group by ELISA. These markers were significantly elevated in plasma from coagulopathic patients compared with other groups. Syndecan-1 (D), soluble thrombomodulin (E) and VWF(F) were positively correlated with citH3-DNA in samples from coagulopathic patients. Statistics, Kruskal-Wallis test with Dunn's multiple comparisons test(A-C), Spearman correlation test(D-F). Data are presented as the mean  $\pm$  SD. \*P < 0.05, \*\*P < 0.01, \*\*\*P < 0.001 and\*\*\*\*P < 0.0001.

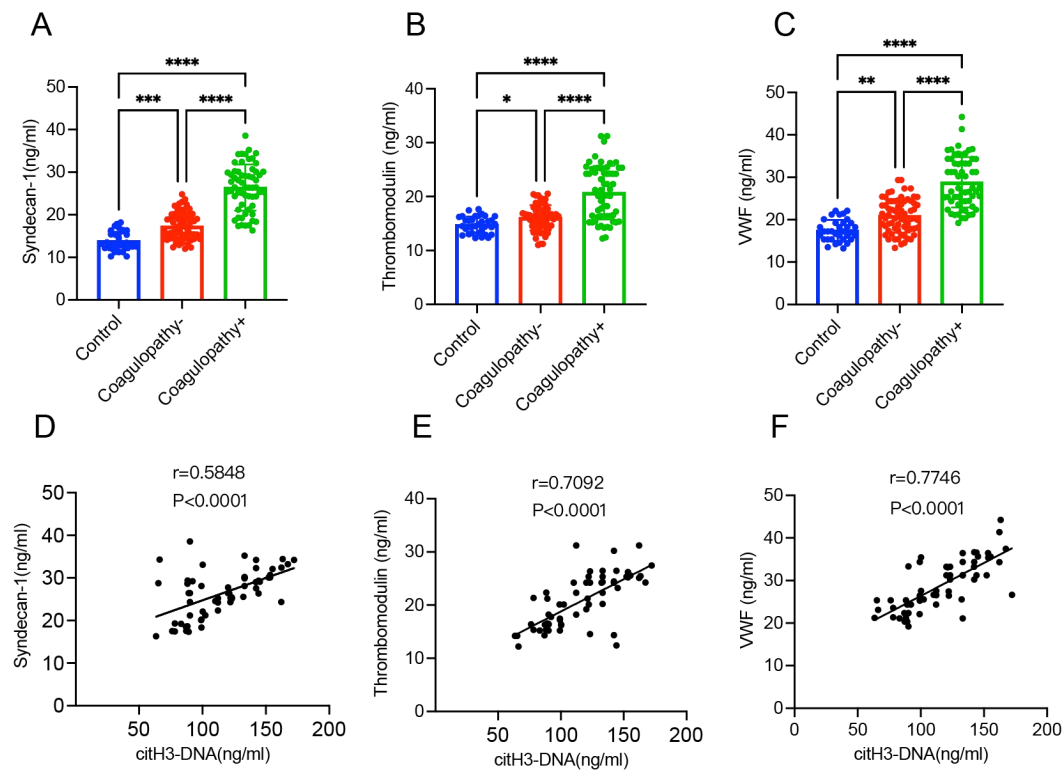

207  
208  
209  
210  
211  
212  
213

214  
215  
216  
217  
218  
219  
220  
221  
222  
223  
224  
225  
226

**Supplement Figure 8**

ECs were incubated with NETs from healthy subjects and TBI patients and stained with syndecan-1, soluble thrombomodulin and VWF. ELISA results suggested that syndecan-1 (A), soluble thrombomodulin (B) and VWF(C) levels in the supernatant of treated ECs. Statistics, Kruskal-Wallis test with Dunn's multiple comparisons test(A-C), Data are presented as the mean  $\pm$  SD. \*P< 0.05, \*\*P< 0.01 and \*\*\*\*P< 0.0001.

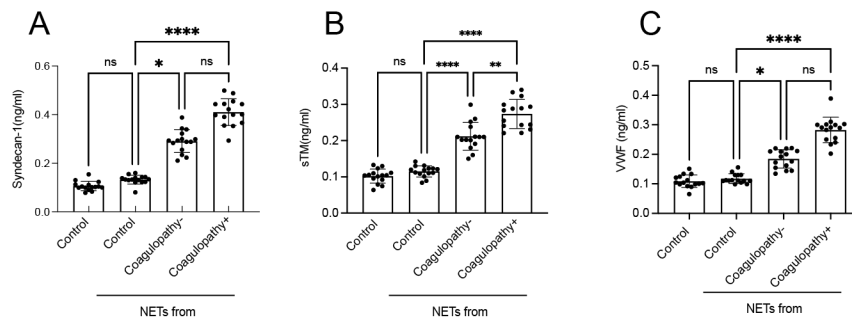

227  
228  
229  
230  
231  
232  
233  
234  
235  
236  
237  
238  
239  
240  
241  
242  
243  
244  
245

246

247

248

249

250

251 **Supplement Figure 9**

252 Represented confocal microscopy images of brain tissues from sham and TBI mice. NETs

253 were stained with citH3(green) and Ly6G(red). The inset bar is equal 40  $\mu$ m.

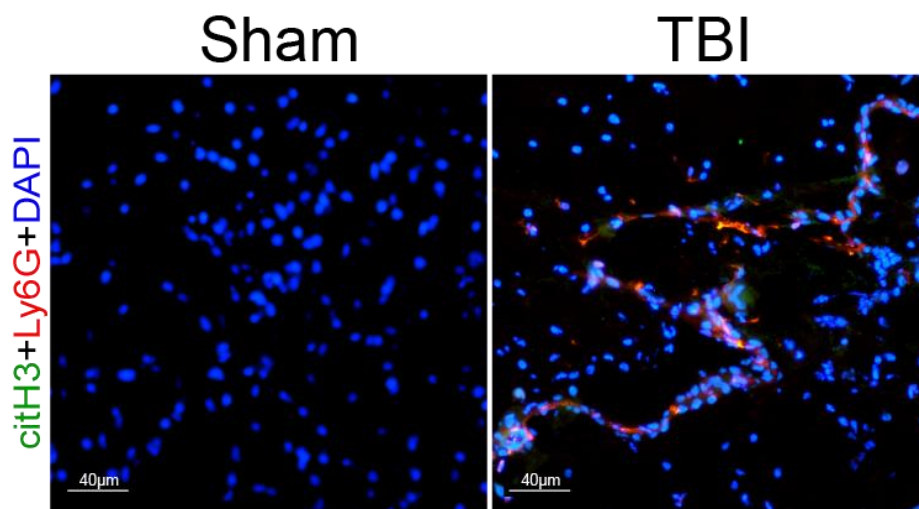

254

255

256

257

258

259

260

261

262

263

264

265

266

267

268

269

270

271

272 **Supplement Figure 10**

273 Phosphotungstic acid hematoxylin staining of the lungs(A-C) and kidneys(D-F) from sham,

274 TBI+Saline and TBI+DNase I. Phosphotungstic acid hematoxylin staining indicated

275 widespread fibrin deposition (black, arrowbar) in the microvasculature of the lungs and

276 kidney of TBI mice but not in the same organs of TBI mice treated with DNase I. The inset

277 bar in A-F is equal 40  $\mu$ m.

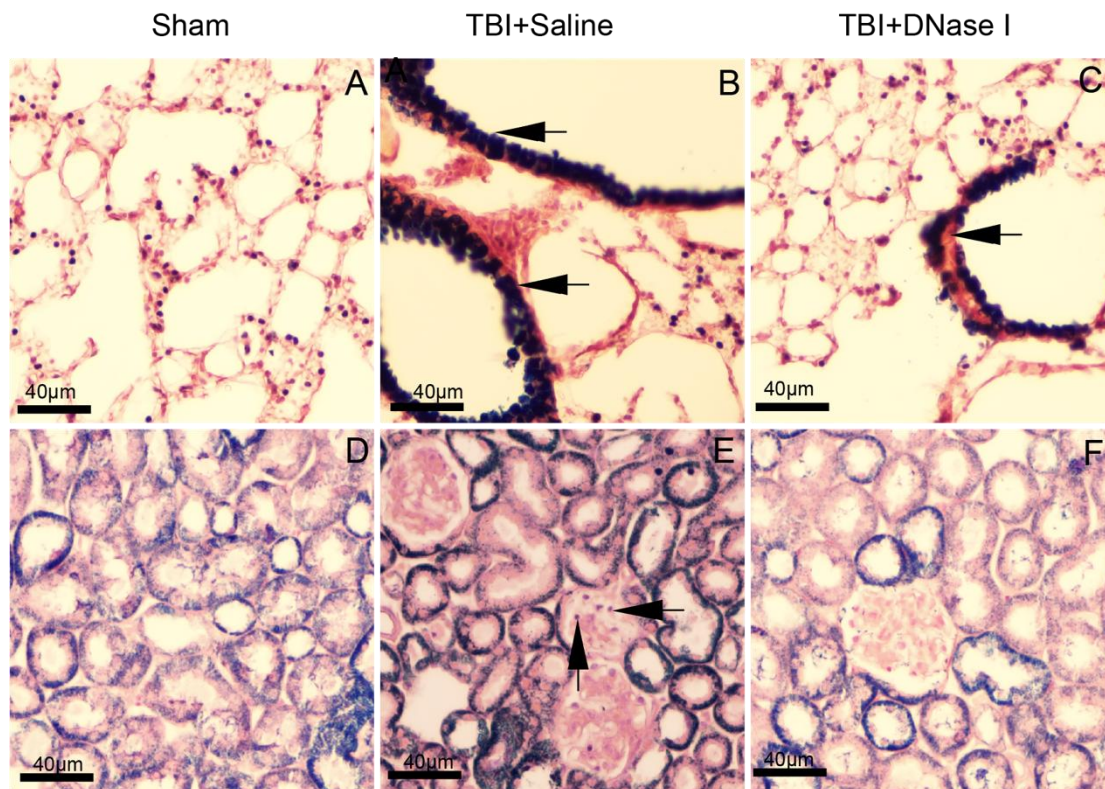

278

279

280 **References**

- 281 1. Chrysanthopoulou A, Gkaliagkousi E, Lazaridis A, Arelaki S, Pateinakis P,  
282 Ntinopoulou M, et al. Angiotensin II triggers release of neutrophil  
283 extracellular traps, linking thromboinflammation with essential hypertension.  
284 *JCI Insight*. 2021;6(18).
- 285 2. Stakos DA, Kambas K, Konstantinidis T, Mitroulis I, Apostolidou E, Arelaki  
286 S, et al. Expression of functional tissue factor by neutrophil extracellular traps  
287 in culprit artery of acute myocardial infarction. *Eur Heart J*.  
288 2015;36(22):1405-14.
